# Supplementary material
Source: PubMed Central journal article supplement (PMC3617041)
Supplement: NIHMS302352-supplement-01.pdf [file NIHMS302352-supplement-01.pdf]

Type of file: figure

Label: Figures

Filename: sfig\_1.pdf

# Supplementary Figure 1. Diverse Transcriptional Effects of SMAD6 Downregulation

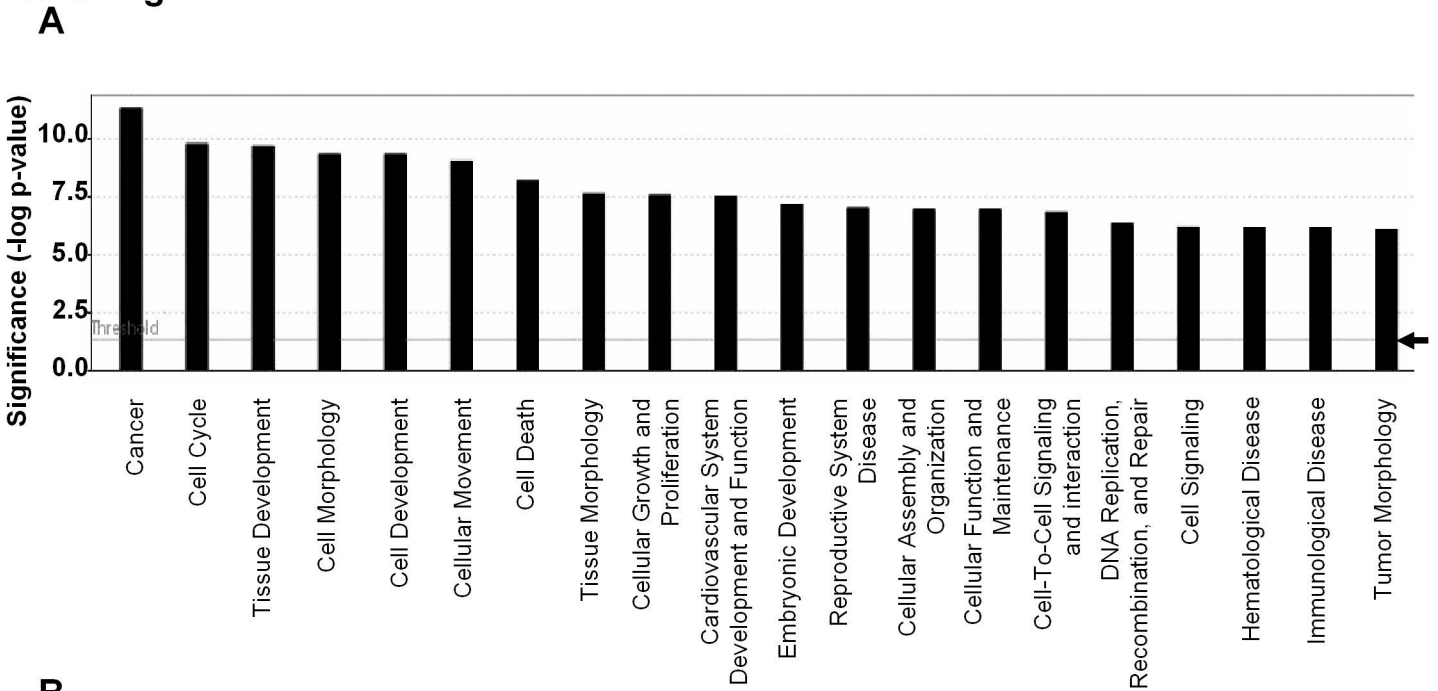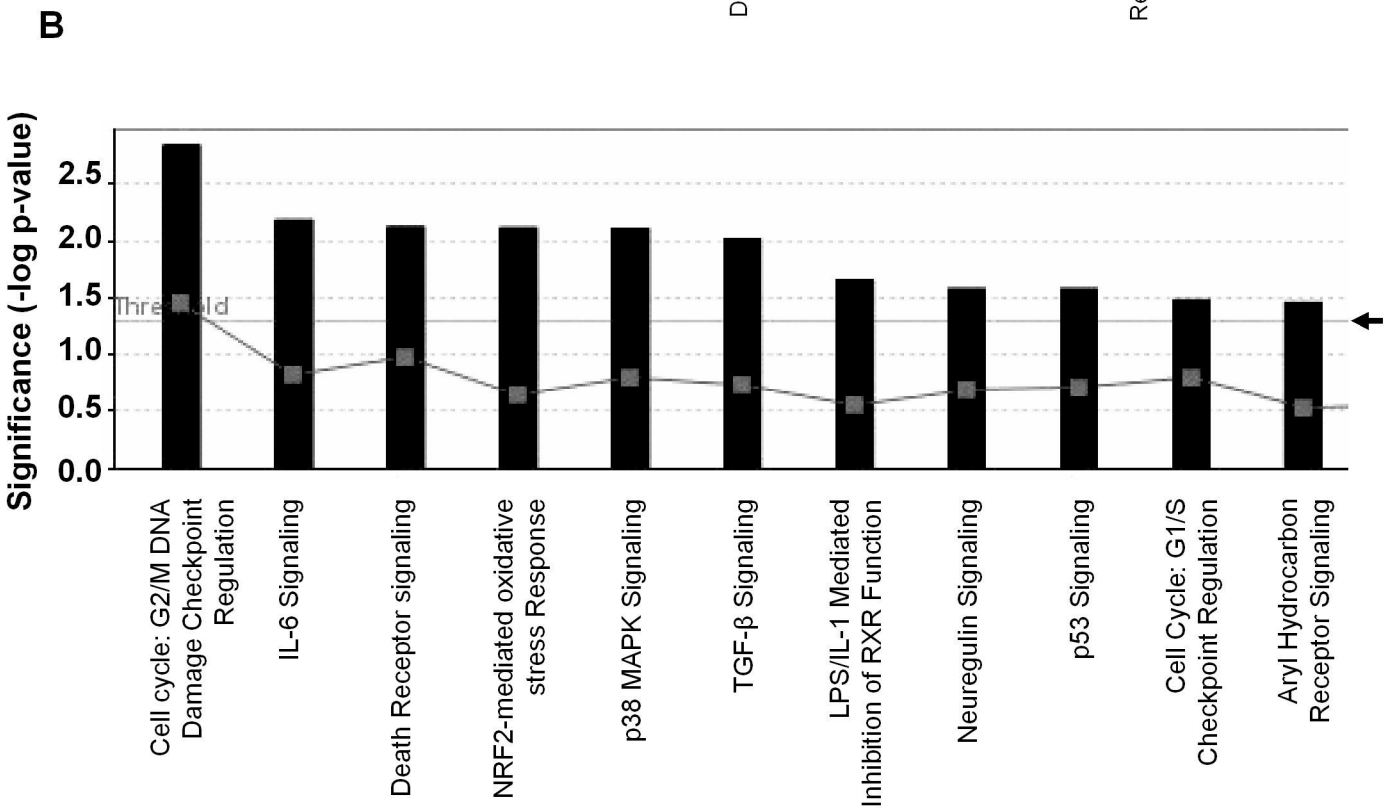

(A) The 20 most significant functional categories from Ingenuity Pathway Analysis (IPA). The significance threshold shown in arrow represents  $P = 0.05$ . The set of functions shown below represent  $P < 0.01$ . (B) Significant canonical pathways from IPA. The significance threshold shown in arrow represents  $P = 0.05$ . Closed markers show the ratio between all samples in each pathway.

Type of file: table

Label: Table

Filename: stab\_1-4.pdf

Supplementary Table 1. shRNA Sequence for *Smad6*

|          |                                                                                        |
|----------|----------------------------------------------------------------------------------------|
| shRNA #1 | 5'-CCGGCGGCGACTTTGGCGAAGTCGTCTCGAGACGACTTCG<br>CCAAAGTCGCCGTTTTT -3' (RHS3979-9586746) |
| shRNA #2 | 5'-CCGGCTTACACTGAAACGGAGGCTACTCGAGTAGCCTCCG<br>TTTCAGTGTAAGTTTTT-3' (RHS3979-9586743)  |
| shRNA #3 | 5'- CCGGGGATTCCCAGCAGCTCTTTGGCTCGAGCCAAGAGCT<br>GCTGGGAATCCTTTTTG-3'                   |

Supplementary Table 2. Expression of SAMD6 and clinical characteristics in non-small cell lung cancer.

| <b>Staining Status</b>         | <b>No. of Cases</b> | <b>SMAD6</b> |            |
|--------------------------------|---------------------|--------------|------------|
|                                |                     | <b>+</b>     | <b>-</b>   |
| <b>Tumor Scored</b>            | <b>242</b>          | <b>122</b>   | <b>120</b> |
| <b>Gender</b>                  | <b>214</b>          |              |            |
| <b>Male</b>                    |                     | <b>73</b>    | <b>79</b>  |
| <b>Female</b>                  |                     | <b>26</b>    | <b>36</b>  |
| <b>Tumor Type</b>              | <b>240</b>          |              |            |
| <b>Adanocarcinoma</b>          |                     | <b>60</b>    | <b>68</b>  |
| <b>Squamous Cell Carcinima</b> |                     | <b>62</b>    | <b>52</b>  |
| <b>Stage</b>                   | <b>178</b>          |              |            |
| <b>I</b>                       |                     | <b>59</b>    | <b>52</b>  |
| <b>II</b>                      |                     | <b>17</b>    | <b>14</b>  |
| <b>III</b>                     |                     | <b>13</b>    | <b>14</b>  |
| <b>IV</b>                      |                     | <b>4</b>     | <b>5</b>   |

Supplementary Table 3. Upregulated genes by SMAD6 knockdown

| Gene ID              |                                              | Log <sub>2</sub> Ratio<br>shRNA#1/M* | Log <sub>2</sub> Ratio<br>shRNA#3/M* |
|----------------------|----------------------------------------------|--------------------------------------|--------------------------------------|
| Extracellular matrix |                                              |                                      |                                      |
| NM_000138.1          | Fibrillin 1 (Marfan syndrome) (FBN1)         | 2.86(±0.88)                          | 2.10(±0.67)                          |
| NM_002423.2          | Matrix metalloproteinase 7 (MMP-7)           | 1.09(±0.26)                          | 5.15(±0.71)                          |
| NM_003255.2          | Tissue inhibitor of metalloproteinase 2      | 1.08(±0.19)                          | 2.36(±0.36)                          |
| NM_004353.1          | Clade H, member 1 (SERPINH1)                 | 1.95(±0.38)                          | 1.85(±0.26)                          |
| Cytokine             |                                              |                                      |                                      |
| NM_000584.1          | Interleukin 8 (IL8)                          | 4.04(±1.47)                          | 2.88(±1.50)                          |
| M19154.1             | Transforming growth factor-beta-2            | 2.76(±0.64)                          | 3.14(±0.65)                          |
| M37435.1             | Macrophage colony-stimulating factor         | 2.78(±0.54)                          | 1.87(±0.65)                          |
| NM_013957.1          | Neuregulin 1 (NRG1)                          | 1.76(±0.48)                          | 3.15(±0.44)                          |
| Signal transduction  |                                              |                                      |                                      |
| NM_006398.1          | Diubiquitin (UBD)                            | 6.33(±0.31)                          | 4.64(±1.06)                          |
| NM_000602.1          | Plasminogen activator inhibitor type 1       | 5.95(±0.35)                          | 3.88(±0.25)                          |
| NM_003246.1          | Thrombospondin 1                             | 3.77(±0.76)                          | 1.53(±0.37)                          |
| NM_005562.1          | Laminin, gamma 2                             | 3.64(±1.35)                          | 3.73(±0.53)                          |
| NM_002260.2          | Killer cell lectin-like receptor subfamily C | 3.58(±1.93)                          | 3.95(±1.03)                          |
| AF091395.1           | Trio isoform mRNA                            | 2.23(±0.25)                          | 1.91(±0.49)                          |
| NM_002228.2          | v-jun avian sarcoma virus 17 oncogene (JUN)  | 2.17(±1.65)                          | 2.60(±1.35)                          |
| NM_025195.1          | G-protein-coupled receptor induced protein   | 1.85(±0.44)                          | 2.15(±0.61)                          |
| X83493.1             | Fas/Apo-1                                    | 1.82(±0.63)                          | 2.08(±0.74)                          |
| NM_013253.1          | Dickkopf gene 3 (DKK3)                       | 1.51(±0.39)                          | 2.70(±0.77)                          |
| NM_002826.2          | Quiescin Q6 (QSCN6)                          | 1.39(±0.42)                          | 2.14(±0.59)                          |
| Others               |                                              |                                      |                                      |
| U17497.1             | Proteasome subunit LMP7                      | 2.48(±0.98)                          | 2.55(±0.93)                          |
| NM_002852.1          | Pentaxin-related gene (PTX3)                 | 2.44(±1.09)                          | 2.05(±0.78)                          |
| D42043.1             | KIAA0084 protein                             | 2.34(±0.40)                          | 2.40(±0.95)                          |
| NM_014890.1          | Downregulated in ovarian cancer 1 (DOC1)     | 2.22(±0.51)                          | 2.87(±0.52)                          |
| AI700633             | cDNA: FLJ22642 fis, clone HSI06970           | 1.63(±0.35)                          | 2.18(±0.25)                          |

\* This ratio represent to average and standard deviation.

Supplementary Table 4. Downregulated genes by SMAD6 knockdown

| Gene ID                          |                                           | Log <sub>2</sub> Ratio<br>shRNA#1/M* | Log <sub>2</sub> Ratio<br>shRNA#3/M* |
|----------------------------------|-------------------------------------------|--------------------------------------|--------------------------------------|
| <b>Chromatin remodeling</b>      |                                           |                                      |                                      |
| NM_001067.1                      | Topoisomerase (DNA) II alpha              | -2.74(±0.97)                         | -3.74(±1.93)                         |
| NM_004523.2                      | Kinesin-like 1 (KNSL1)                    | -2.42(±1.44)                         | -2.80(±1.80)                         |
| NM_004856.3                      | Kinesin-like 5 (KNSL5)                    | -2.06(±0.83)                         | -1.88(±1.26)                         |
| NM_005804.1                      | Nuclear RNA helicase, (DDXL)              | -1.55(±0.32)                         | -1.05(±0.03)                         |
| NM_001809.2                      | Centromere protein A (17kD) (CENPA)       | -1.49(±0.39)                         | -2.20(±0.69)                         |
| <b>Differentiation</b>           |                                           |                                      |                                      |
| NM_000790.1                      | Dopa decarboxylase (DDC)                  | -2.32(±0.27)                         | -1.43(±0.31)                         |
| NM_000435.1                      | Notch homolog 3 (NOTCH3)                  | -1.67(±0.28)                         | -1.23(±0.13)                         |
| <b>Transcription/Translation</b> |                                           |                                      |                                      |
| NM_004701.2                      | Cyclin B2 (CCNB2)                         | -2.10(±0.63)                         | -2.26(±0.75)                         |
| NM_000791.2                      | Dihydrofolate reductase (DHFR)            | -1.63(±0.51)                         | -2.00(±0.92)                         |
| <b>Signal transduction</b>       |                                           |                                      |                                      |
| NM_001982.1                      | ERBB3                                     | -2.01(±0.92)                         | -1.47(±0.86)                         |
| NM_004360.1                      | E-cadherin                                | -2.26(±0.98)                         | -3.41(±0.92)                         |
| NM_014501.1                      | Ubiquitin carrier protein (E2-EPF)        | -1.37(±0.16)                         | -1.45(±0.12)                         |
| AW157070                         | Epidermal growth factor receptor          | -1.66(±0.27)                         | -2.62(±0.70)                         |
| <b>Others</b>                    |                                           |                                      |                                      |
| NM_000728.1                      | Calcitonin-related polypeptide            | -4.12(±2.59)                         | -3.31(±1.73)                         |
| NM_000709.1                      | Branched chain keto acid dehydrogenase E1 | -1.86(±0.69)                         | -1.59(±1.10)                         |
| AB006955.1                       | mRNA for AIE-75                           | -1.81(±0.88)                         | -2.40(±0.45)                         |
| NM_001902                        | Cystathionase (CTH)                       | -1.60(±0.36)                         | -2.18(±0.16)                         |
| NM_001360.1                      | 7-dehydrocholesterol reductase (DHCR7)    | -1.38(±0.24)                         | -1.64(±0.24)                         |
| NM_003749.1                      | Insulin receptor substrate-2 (IRS2)       | -1.21(±0.22)                         | -1.02(±0.23)                         |

\* This ratio represent to average and standard deviation.
